# Supplementary material
Source: publisher figshare collection journal article supplement (https://gsapubs.figshare.com/ndownloader/files/37379218)
Supplement: Supplementary file 1 [file 37379218]

## Sheet: Table DR2
Locality	Rock type	Sample number	Ages						Age used for compliation	Dating method	Reference
			207Pb/206Pb	1σ	207Pb/235U	1σ	206Pb/238U	1σ
South Balong	Gneissic granite	148-2-01	903	31	886	13	879	7	879	LA-ICPMS zircon U-Pb	Chen, 2015
South Balong	Gneissic granite	148-2-02	931	54	897	23	883	8	883	LA-ICPMS zircon U-Pb	Chen, 2015
South Balong	Gneissic granite	148-2-03	926	37	888	15	872	8	872	LA-ICPMS zircon U-Pb	Chen, 2015
South Balong	Gneissic granite	148-2-04	942	35	882	16	858	8	858	LA-ICPMS zircon U-Pb	Chen, 2015
South Balong	Gneissic granite	148-2-05	988	37	897	16	861	7	861	LA-ICPMS zircon U-Pb	Chen, 2015
South Balong	Gneissic granite	148-2-07	948	36	898	16	878	7	878	LA-ICPMS zircon U-Pb	Chen, 2015
South Balong	Gneissic granite	148-2-08	751	36	580	10	537	6	537	LA-ICPMS zircon U-Pb	Chen, 2015
South Balong	Gneissic granite	148-2-10	935	32	803	13	756	7	756	LA-ICPMS zircon U-Pb	Chen, 2015
South Balong	Gneissic granite	148-2-11	922	34	880	15	863	9	863	LA-ICPMS zircon U-Pb	Chen, 2015
South Balong	Gneissic granite	148-2-13	902	38	868	15	854	7	854	LA-ICPMS zircon U-Pb	Chen, 2015
South Balong	Gneissic granite	148-2-14	959	34	893	14	866	8	866	LA-ICPMS zircon U-Pb	Chen, 2015
South Balong	Gneissic granite	148-2-15	927	34	877	14	858	8	858	LA-ICPMS zircon U-Pb	Chen, 2015
South Balong	Gneissic granite	148-2-16	925	40	846	16	816	7	816	LA-ICPMS zircon U-Pb	Chen, 2015
South Balong	Gneissic granite	148-2-17	963	50	914	23	894	8	894	LA-ICPMS zircon U-Pb	Chen, 2015
South Balong	Gneissic granite	148-2-18	989	37	858	16	809	6	809	LA-ICPMS zircon U-Pb	Chen, 2015
South Balong	Gneissic granite	148-2-19	933	37	894	17	878	7	878	LA-ICPMS zircon U-Pb	Chen, 2015
South Balong	Gneissic granite	148-2-20	762	48	712	16	696	9	696	LA-ICPMS zircon U-Pb	Chen, 2015
South Balong	Gneissic granite	148-2-21	948	34	846	15	808	8	808	LA-ICPMS zircon U-Pb	Chen, 2015
South Balong	Gneissic granite	150-1-01	966	31	902	16	576	9	576	LA-ICPMS zircon U-Pb	Chen, 2015
South Balong	Gneissic granite	150-1-02	975	37	896	16	565	7	565	LA-ICPMS zircon U-Pb	Chen, 2015
South Balong	Gneissic granite	150-1-03	933	36	892	14	575	8	575	LA-ICPMS zircon U-Pb	Chen, 2015
South Balong	Gneissic granite	150-1-04	908	33	889	13	551	7	551	LA-ICPMS zircon U-Pb	Chen, 2015
South Balong	Gneissic granite	150-1-05	523	47	470	9	459	7	459	LA-ICPMS zircon U-Pb	Chen, 2015
South Balong	Gneissic granite	150-1-06	778	37	724	11	707	7	707	LA-ICPMS zircon U-Pb	Chen, 2015
South Balong	Gneissic granite	150-1-07	905	47	875	24	864	17	864	LA-ICPMS zircon U-Pb	Chen, 2015
South Balong	Gneissic granite	150-1-08	630	65	480	15	449	4	449	LA-ICPMS zircon U-Pb	Chen, 2015
South Balong	Gneissic granite	150-1-09	894	68	839	17	819	15	819	LA-ICPMS zircon U-Pb	Chen, 2015
South Balong	Gneissic granite	150-1-10	743	56	565	13	522	6	522	LA-ICPMS zircon U-Pb	Chen, 2015
South Balong	Gneissic granite	150-1-11	902	34	888	14	883	7	883	LA-ICPMS zircon U-Pb	Chen, 2015
South Balong	Gneissic granite	150-1-12	999	35	758	14	679	14	679	LA-ICPMS zircon U-Pb	Chen, 2015
South Balong	Gneissic granite	150-1-13	933	33	768	11	713	9	713	LA-ICPMS zircon U-Pb	Chen, 2015
South Balong	Gneissic granite	150-1-14	1016	49	672	14	574	7	574	LA-ICPMS zircon U-Pb	Chen, 2015
South Balong	Gneissic granite	150-1-15	977	33	582	9	486	7	486	LA-ICPMS zircon U-Pb	Chen, 2015
South Balong	Gneissic granite	150-1-16	909	35	794	15	753	13	753	LA-ICPMS zircon U-Pb	Chen, 2015
South Balong	Gneissic granite	150-1-17	989	66	583	19	485	6	485	LA-ICPMS zircon U-Pb	Chen, 2015
South Balong	Gneissic granite	150-1-18	860	51	802	20	781	20	781	LA-ICPMS zircon U-Pb	Chen, 2015
South Balong	Gneissic granite	150-1-19	849	30	789	12	768	9	768	LA-ICPMS zircon U-Pb	Chen, 2015
South Balong	Gneissic granite	150-1-21	944	36	656	11	575	10	575	LA-ICPMS zircon U-Pb	Chen, 2015
Hatugou	Gneissic granite	11602-2-01	461	69	438	8	434	9	434	LA-ICPMS zircon U-Pb	Chen, 2015
Hatugou	Gneissic granite	11602-2-02	735	69	710	13	702	14	702	LA-ICPMS zircon U-Pb	Chen, 2015
Hatugou	Gneissic granite	11602-2-03	806	67	843	14	857	17	857	LA-ICPMS zircon U-Pb	Chen, 2015
Hatugou	Gneissic granite	11602-2-04	846	64	508	9	437	9	437	LA-ICPMS zircon U-Pb	Chen, 2015
Hatugou	Gneissic granite	11602-2-05	423	75	439	10	442	9	442	LA-ICPMS zircon U-Pb	Chen, 2015
Hatugou	Gneissic granite	11602-2-06	503	69	447	9	437	9	437	LA-ICPMS zircon U-Pb	Chen, 2015
Hatugou	Gneissic granite	11602-2-07	904	65	867	14	852	17	852	LA-ICPMS zircon U-Pb	Chen, 2015
Hatugou	Gneissic granite	11602-2-08	837	66	785	13	766	15	766	LA-ICPMS zircon U-Pb	Chen, 2015
Hatugou	Gneissic granite	11602-2-09	863	68	860	15	859	17	859	LA-ICPMS zircon U-Pb	Chen, 2015
Hatugou	Gneissic granite	11602-2-10	916	67	873	15	856	17	856	LA-ICPMS zircon U-Pb	Chen, 2015
Hatugou	Gneissic granite	11602-2-11	550	69	444	9	424	9	424	LA-ICPMS zircon U-Pb	Chen, 2015
Hatugou	Gneissic granite	11602-2-12	444	78	428	10	425	9	425	LA-ICPMS zircon U-Pb	Chen, 2015
Hatugou	Gneissic granite	11602-2-13	831	70	849	16	857	17	857	LA-ICPMS zircon U-Pb	Chen, 2015
Hatugou	Gneissic granite	11602-2-14	851	73	854	17	855	18	855	LA-ICPMS zircon U-Pb	Chen, 2015
Hatugou	Gneissic granite	11602-2-15	833	73	837	16	839	17	839	LA-ICPMS zircon U-Pb	Chen, 2015
Hatugou	Gneissic granite	11602-2-16	937	70	878	16	855	17	855	LA-ICPMS zircon U-Pb	Chen, 2015
Hatugou	Gneissic granite	11602-2-17	901	67	869	15	857	17	857	LA-ICPMS zircon U-Pb	Chen, 2015
Hatugou	Gneissic granite	11602-2-18	745	76	644	14	615	13	615	LA-ICPMS zircon U-Pb	Chen, 2015
Hatugou	Gneissic granite	11602-2-19	462	76	444	10	441	9	441	LA-ICPMS zircon U-Pb	Chen, 2015
Hatugou	Gneissic granite	11602-2-20	839	76	647	15	594	13	594	LA-ICPMS zircon U-Pb	Chen, 2015
Hatugou	Gneissic granite	11602-2-21	935	68	674	16	599	12	599	LA-ICPMS zircon U-Pb	Chen, 2015
Hatugou	Gneissic granite	11602-2-22	439	76	434	10	433	9	433	LA-ICPMS zircon U-Pb	Chen, 2015
Hatugou	Gneissic granite	11602-2-23	810	71	653	13	609	13	609	LA-ICPMS zircon U-Pb	Chen, 2015
Hatugou	Gneissic granite	11602-2-24	858	69	857	16	857	18	857	LA-ICPMS zircon U-Pb	Chen, 2015
Hatugou	Gneissic granite	11609-2-01	886	68	894	16	898	19	898	LA-ICPMS zircon U-Pb	Chen, 2015
Hatugou	Gneissic granite	11609-2-02	883	65	887	15	888	19	888	LA-ICPMS zircon U-Pb	Chen, 2015
Hatugou	Gneissic granite	11609-2-03	822	65	549	11	485	11	485	LA-ICPMS zircon U-Pb	Chen, 2015
Hatugou	Gneissic granite	11609-2-04	910	70	905	17	903	19	903	LA-ICPMS zircon U-Pb	Chen, 2015
Hatugou	Gneissic granite	11609-2-05	786	76	786	17	786	17	786	LA-ICPMS zircon U-Pb	Chen, 2015
Hatugou	Gneissic granite	11609-2-06	905	63	898	15	895	19	895	LA-ICPMS zircon U-Pb	Chen, 2015
Hatugou	Gneissic granite	11609-2-07	813	66	703	13	669	14	669	LA-ICPMS zircon U-Pb	Chen, 2015
Hatugou	Gneissic granite	11609-2-08	918	66	905	16	900	19	900	LA-ICPMS zircon U-Pb	Chen, 2015
Hatugou	Gneissic granite	11609-2-09	839	65	709	13	668	14	668	LA-ICPMS zircon U-Pb	Chen, 2015
Hatugou	Gneissic granite	11609-2-10	887	65	894	15	898	19	898	LA-ICPMS zircon U-Pb	Chen, 2015
Hatugou	Gneissic granite	11609-2-11	913	65	897	15	891	19	891	LA-ICPMS zircon U-Pb	Chen, 2015
Hatugou	Gneissic granite	11609-2-12	894	74	901	18	904	19	904	LA-ICPMS zircon U-Pb	Chen, 2015
Hatugou	Gneissic granite	11609-2-13	942	67	904	16	888	19	888	LA-ICPMS zircon U-Pb	Chen, 2015
Hatugou	Gneissic granite	11609-2-14	901	65	892	15	889	19	889	LA-ICPMS zircon U-Pb	Chen, 2015
Hatugou	Gneissic granite	11609-2-15	883	66	899	15	906	19	906	LA-ICPMS zircon U-Pb	Chen, 2015
Hatugou	Gneissic granite	11609-2-16	769	66	700	13	679	14	679	LA-ICPMS zircon U-Pb	Chen, 2015
Hatugou	Gneissic granite	11609-2-17	776	70	695	14	671	14	671	LA-ICPMS zircon U-Pb	Chen, 2015
Hatugou	Gneissic granite	11609-2-18	815	73	712	15	679	15	679	LA-ICPMS zircon U-Pb	Chen, 2015
Hatugou	Gneissic granite	11609-2-19	878	67	893	16	900	19	900	LA-ICPMS zircon U-Pb	Chen, 2015
Hatugou	Gneissic granite	11609-2-20	913	67	896	16	890	19	890	LA-ICPMS zircon U-Pb	Chen, 2015
Hatugou	Gneissic granite	11609-2-21	889	67	887	16	886	19	886	LA-ICPMS zircon U-Pb	Chen, 2015
Hatugou	Gneissic granite	11609-2-22	844	67	883	16	899	19	899	LA-ICPMS zircon U-Pb	Chen, 2015
Hatugou	Gneissic granite	11609-2-23	898	69	895	16	894	19	894	LA-ICPMS zircon U-Pb	Chen, 2015
Hatugou	Gneissic granite	11609-2-24	744	78	702	16	690	15	690	LA-ICPMS zircon U-Pb	Chen, 2015
Bokalike	Gneissic granite	NLG-142A-01	1029	67.3	950	12.8	915	12.5	915	LA-ICPMS zircon U-Pb	He, 2016
Bokalike	Gneissic granite	NLG-142A-02	2195	52.7	2189	13.7	2181	26.2	2195	LA-ICPMS zircon U-Pb	He, 2016
Bokalike	Gneissic granite	NLG-142A-04	920	62.7	891	9.2	879	11.4	879	LA-ICPMS zircon U-Pb	He, 2016
Bokalike	Gneissic granite	NLG-142A-05	1013	65.2	949	11.5	920	12.2	920	LA-ICPMS zircon U-Pb	He, 2016
Bokalike	Gneissic granite	NLG-142A-06	1074	65.2	896	11.4	825	11.1	825	LA-ICPMS zircon U-Pb	He, 2016
Bokalike	Gneissic granite	NLG-142A-07	975	79	899	17.4	867	13	867	LA-ICPMS zircon U-Pb	He, 2016
Bokalike	Gneissic granite	NLG-142A-08	994	64	919	10.7	888	11.6	888	LA-ICPMS zircon U-Pb	He, 2016
Bokalike	Gneissic granite	NLG-142A-09	1034	79.2	951	18.2	915	13.8	915	LA-ICPMS zircon U-Pb	He, 2016
Bokalike	Gneissic granite	NLG-142A-10	1040	76.8	973	17.5	943	13.9	943	LA-ICPMS zircon U-Pb	He, 2016
Bokalike	Gneissic granite	NLG-142A-12	999	70.7	978	14.4	968	13.3	968	LA-ICPMS zircon U-Pb	He, 2016
Bokalike	Gneissic granite	NLG-142A-14	1002	73.9	988	16.1	981	13.9	981	LA-ICPMS zircon U-Pb	He, 2016
Bokalike	Gneissic granite	NLG-142A-15	996	81.1	907	18.3	871	13.2	871	LA-ICPMS zircon U-Pb	He, 2016
Bokalike	Gneissic granite	NLG-142A-16	979	63.6	810	9.3	749	9.7	749	LA-ICPMS zircon U-Pb	He, 2016
Bokalike	Gneissic granite	NLG-142A-18	986	78	923	17.1	896	13.1	896	LA-ICPMS zircon U-Pb	He, 2016
Bokalike	Gneissic granite	NLG-142A-19	960	73.6	892	14.7	864	12	864	LA-ICPMS zircon U-Pb	He, 2016
Bokalike	Gneissic granite	NLG-142A-20	918	77.5	800	15	758	10.9	758	LA-ICPMS zircon U-Pb	He, 2016
Bokalike	Gneissic granite	NLG-142A-21	916	77.6	822	15.3	787	11.3	787	LA-ICPMS zircon U-Pb	He, 2016
Bokalike	Gneissic granite	NLG-142A-22	1546	59.5	1431	13.3	1353	17	1546	LA-ICPMS zircon U-Pb	He, 2016
Bokalike	Gneissic granite	NLG-142A-23	1010	66.4	999	12.2	994	12.8	994	LA-ICPMS zircon U-Pb	He, 2016
Bokalike	Gneissic granite	NLG-142A-24	943	66.9	891	11.3	869	11.2	869	LA-ICPMS zircon U-Pb	He, 2016
Bokalike	Gneissic granite	NLG-142A-25	918	66.3	875	10.7	858	11	858	LA-ICPMS zircon U-Pb	He, 2016
Bokalike	Gneissic granite	NLG-142A-26	896	65.4	825	9.7	799	10.1	799	LA-ICPMS zircon U-Pb	He, 2016
Bokalike	Gneissic granite	NLG-142A-29	950	64.9	949	10.7	948	11.9	948	LA-ICPMS zircon U-Pb	He, 2016
Bokalike	Gneissic granite	NLG-142A-30	948	64	921	9.8	909	11.3	909	LA-ICPMS zircon U-Pb	He, 2016
Bokalike	Gneissic granite	NLG-142A-31	1028	63	916	9.7	870	10.8	870	LA-ICPMS zircon U-Pb	He, 2016
Bokalike	Gneissic granite	NLG-142A-34	970	67.1	964	12	960	12.3	960	LA-ICPMS zircon U-Pb	He, 2016
Bokalike	Gneissic granite	NLG-142A-35	983	71.5	974	14.6	969	12.9	969	LA-ICPMS zircon U-Pb	He, 2016
Bokalike	Gneissic granite	NLG-142A-37	950	83.4	868	18.2	836	12.4	836	LA-ICPMS zircon U-Pb	He, 2016
Bokalike	Gneissic granite	NLG-142A-38	995	63.7	934	10.1	907	11.1	907	LA-ICPMS zircon U-Pb	He, 2016
Bokalike	Gneissic granite	NLG-142A-39	988	94.8	988	24.7	987	16.4	987	LA-ICPMS zircon U-Pb	He, 2016
Bokalike	Gneissic granite	NLG-142A-40	1011	62.5	919	9.1	882	10.6	882	LA-ICPMS zircon U-Pb	He, 2016
Bokalike	Gneissic granite	NLG-142A-41	995	85.6	839	18.8	781	11.8	781	LA-ICPMS zircon U-Pb	He, 2016
Bokalike	Gneissic granite	NLG-142A-42	980	70.9	972	14	968	12.6	968	LA-ICPMS zircon U-Pb	He, 2016
Bokalike	Gneissic granite	NLG-142A-43	992	66.4	949	11.6	930	11.6	930	LA-ICPMS zircon U-Pb	He, 2016
Bokalike	Gneissic granite	NLG-142A-44	1009	63.6	959	9.9	937	11.2	937	LA-ICPMS zircon U-Pb	He, 2016
Bokalike	Gneissic granite	NLG-142A-45	947	64.1	905	9.5	887	10.6	887	LA-ICPMS zircon U-Pb	He, 2016
Bokalike	Gneissic granite	NLG-142A-46	946	71.5	823	12.6	778	10.1	778	LA-ICPMS zircon U-Pb	He, 2016
Bokalike	Gneissic granite	NLG-142A-47	967	65.8	902	10.5	876	10.7	876	LA-ICPMS zircon U-Pb	He, 2016
Bokalike	Gneissic granite	NLG-142A-48	939	64.6	904	9.7	889	10.7	889	LA-ICPMS zircon U-Pb	He, 2016
Bokalike	Gneissic granite	NLG-142A-50	1416	60.6	1318	12.2	1259	14.9	1416	LA-ICPMS zircon U-Pb	He, 2016
Bokalike	Gneissic granite	NLG-142A-51	996	71.8	932	14	905	11.8	905	LA-ICPMS zircon U-Pb	He, 2016
Bokalike	Gneissic granite	NLG-142A-52	1025	80.6	894	17.6	842	12	842	LA-ICPMS zircon U-Pb	He, 2016
Bokalike	Gneissic granite	NLG-142A-53	968	66.9	907	11.1	882	10.7	882	LA-ICPMS zircon U-Pb	He, 2016
Bokalike	Gneissic granite	NLG-142A-54	959	65	955	10.3	954	11.3	954	LA-ICPMS zircon U-Pb	He, 2016
Bokalike	Gneissic granite	NLG-142A-57	1017	64.5	1000	10.6	992	11.7	992	LA-ICPMS zircon U-Pb	He, 2016
Bokalike	Gneissic granite	NLG-142A-58	953	67.6	950	11.7	949	11.5	949	LA-ICPMS zircon U-Pb	He, 2016
Bokalike	Gneissic granite	NLG-142A-59	962	66.1	958	10.9	957	11.4	957	LA-ICPMS zircon U-Pb	He, 2016
Bokalike	Gneissic granite	NLG-142A-60	982	67	980	11.7	979	11.8	979	LA-ICPMS zircon U-Pb	He, 2016
Bokalike	Gneissic granite	NLG-142A-61	1044	64.2	1000	10.5	980	11.5	980	LA-ICPMS zircon U-Pb	He, 2016
Bokalike	Gneissic granite	NLG-142A-62	999	65.3	816	9.5	751	8.9	751	LA-ICPMS zircon U-Pb	He, 2016
Bokalike	Gneissic granite	NLG-142A-64	972	101	948	26.2	939	16.1	939	LA-ICPMS zircon U-Pb	He, 2016
Bokalike	Gneissic granite	NLG-142A-65	958	73.1	953	14.5	951	12.1	951	LA-ICPMS zircon U-Pb	He, 2016
Bokalike	Gneissic granite	NLG-142A-66	991	80.6	819	16.4	758	10.5	758	LA-ICPMS zircon U-Pb	He, 2016
Bokalike	Gneissic granite	NLG-142A-67	933	65.7	826	9.4	787	9.2	787	LA-ICPMS zircon U-Pb	He, 2016
Bokalike	Gneissic granite	NLG-142A-68	965	68.8	926	12.1	911	11	911	LA-ICPMS zircon U-Pb	He, 2016
Bokalike	Gneissic granite	NLG-142A-69	1046	75.4	1010	16.6	994	13.2	994	LA-ICPMS zircon U-Pb	He, 2016
Bokalike	Gneissic granite	NLG-142A-70	1052	66.5	952	11.5	910	10.8	910	LA-ICPMS zircon U-Pb	He, 2016
Bokalike	Gneissic granite	NLG-142A-71	2511	52.5	2462	14.1	2404	26.3	2511	LA-ICPMS zircon U-Pb	He, 2016
References Chen, Y.X., 2015, The composition and geological evolution of Pre-cambrain metamorphic rocks in east region of East Kunlun Orgenic Belt [Ph.D. thesis] [in Chinese with English abstract]: Xi'an, Chang'an University, 179 p. He, D.F., 2016, Tectonic evolution of the Precambrian metamorphic rock in East Kunlun Orogenic Belt [Ph.D. thesis] [in Chinese with English abstract]: Xi'an, Northwes…
